# Supplementary material for: Effects of six weeks outdoor versus treadmill running on physical fitness and body composition in recreationally active young males: a pilot study
Source: PeerJ. 2022 Jul 27;10:e13791. doi: 10.7717/peerj.13791 (PMC9338755; doi:10.7717/peerj.13791)
Supplement: Supplemental Information 1 [file peerj-10-13791-s001.xlsx]

## Sheet: Demographics
Sr.No		Age	Height	Body Mass (Pre)	Body Mass (Post)
1	TT	18	170	51.7	50.5
2	TT	17	181	66.3	66.2
3	TT	17	173	70.4	68.7
4	TT	22	165	56.1	56.1
5	TT	21	182	82.6	77.4
6	TT	20	168	49.9	50.8		TT= Treadmill running group
7	TT	20	173	80.8	78.9
8	TT	20	182	72.2	71.7		OT= Outdoor running group
9	TT	20	168	55.9	55.3
10	TT	18	178	59.2	60.9
11	TT	20	174	73.5	71
12	TT	21	178	61.2	60.8
13	TT	19	172	59.6	60.4
14	TT	19	170	58.7	58.7
15	OT	18	167	54.8	54.6
16	OT	21	168	65.3	65.1
17	OT	21	174	70.1	68.5
18	OT	21	168	67.4	66.1
19	OT	20	178	80.5	78
20	OT	21	170	53	54
21	OT	20	169	64.1	62.7
22	OT	20	169	71.1	70
23	OT	20	178	60.7	61
24	OT	20	177	67.9	67.4
25	OT	21	173	65.1	64.5
26	OT	21	170	60.1	60.6
27	OT	20	172	59.7	61
28	OT	19	166	63.3	62
	Mean	19.8214	172.607	64.3286	63.675
	SD	1.27812	4.93918	8.66162	7.65606
TT	Mean	19.4286	173.857	64.15	63.3857
	SD	1.50457	5.54502	10.3332	9.14413
OT	Mean	20.2143	171.357	64.5071	63.9643
	SD	0.892582	4.06878	6.99818	6.15987

## Sheet: Data_Pre-Post
		Physical Fitness Test											Body composition analsysis
Sr.No	Group	1600 m (Pre)	1600 m (Post)	50 mts (Pre)	50 mts (Post)	SLJ (Pre)	SLJ (Post)	Flexbility (Pre)	Flexbility (Post)	Push-ups (Pre)	Push-ups (Post)		Body Mass(Pre)	Body Mass (post)	BMI (Pre)	BMI (Post)	PBF% (Pre)	PBF% (Post)	Fat free Mass (Pre)	Fat free mass (Post)	SMM L leg (Pre)	SMM L leg (Post)	SMM R leg (Pre)	SMM R leg (Post)
1	TT	7.8	7.5	7.67	7.6	1.86	1.92	16	17	15	17		51.7	50.5	17.9	17.5	11.2	12.1	45.9	44.4	1.04	1.1	1.03	1.09
2	TT	7.64	7.6	7.36	7.3	2.2	2.32	26	26	17	18		66.3	66.2	20.2	20.2	13.6	13.4	57.3	57.3	1.6	1.61	1.62	1.58
3	TT	7.49	7.2	8.02	7.95	2.27	2.3	27	28	16	18		70.4	68.7	23.5	23	24.1	21.4	53.4	54	3.03	2.62	3.06	2.65
4	TT	7.52	7.41	6.86	6.8	1.83	1.85	19	20	25	26		56.1	56.1	20.6	20.6	18	16.9	46	46.6	1.81	1.7	1.81	1.7
5	TT	7.54	7.35	8.24	8.2	1.9	1.96	28	29	29	32		82.6	77.4	24.9	23.4	24.9	23	62	59.6	3.73	3.23	3.68	3.18
6	TT	7.68	7.65	7.53	7.48	1.81	1.85	22	24	19	19		49.9	50.8	17.7	18	9.6	10.4	45.1	45.5	0.86	0.95	0.85	0.94
7	TT	7	6.96	8.55	8.49	1.91	2.08	25	25	20	20		80.8	78.9	27	26.4	26.7	26.1	59.2	58.3	3.89	3.72	3.89	3.69
8	TT	6.5	6.2	7.7	7.67	1.9	2.1	23	23	18	20		72.2	71.7	21.8	21.6	17.2	17.2	59.8	59.4	2.24	2.23	2.22	2.2			TT = treadmill running group
9	TT	6.9	6.26	8.26	8.16	2.1	2.26	18	20	21	24		55.9	55.3	19.8	19.6	16.6	15	46.6	47	1.67	1.48	1.66	1.5
10	TT	6.86	6.72	7.6	7.52	2.07	2.25	23	25	19	23		59.2	60.9	19.2	19.2	11.2	11.2	54.1	54.1	1.23	1.23	1.22	1.22			OT = outdoor running group
11	TT	7.6	7.12	7.38	7.3	1.76	1.91	21	25	18	21		73.5	71	24.3	23.5	24.8	22	55.3	55.4	3.25	2.83	3.29	2.79
12	TT	7.67	7.53	7.88	7.73	1.71	1.85	18	24	17	22		61.2	60.8	19.3	19.2	16.7	16.1	51	50	1.83	1.83	1.82	1.72
13	TT	7.36	7.22	7.38	7.33	2	2.15	22	22	19	23		59.6	60.4	20.1	20.4	11.7	11.9	52.6	53.2	1.25	1.3	1.26	1.28
14	TT	8.02	7.9	7.94	7.84	1.93	2.1	25	25	22	24		58.7	58.7	20.3	20	16.7	15.9	48.9	48.5	1.76	1.65	1.76	1.65
15	OT	7.27	6.89	7.63	7.42	2.06	2.16	23	25	24	25		54.8	54.6	19.6	18.9	15.1	14.8	46.5	45.9	1.5	1.4	1.49	1.4
16	OT	7.84	6.28	7.35	7.14	2.12	2.28	21	24	25	27		65.3	65.1	23.1	23.4	25.6	25.4	48.6	48.4	2.95	2.94	3.01	2.89
17	OT	8.04	7.88	8.2	7.98	1.9	2.11	19	25	15	18		70.1	68.5	23.2	22.6	20.8	19.1	55.5	55.1	2.6	2.4	2.6	2.4
18	OT	7.84	7.06	7.18	7	2	2.22	21	21	17	20		67.4	66.1	23.9	23.4	24	21	51.2	49.7	2.93	2.86	2.9	2.87
19	OT	7.26	6.82	7.28	7.01	1.92	2.17	20	25	19	23		80.5	78	25.4	24.6	25.5	22.4	60	60.2	3.68	3.61	3.66	3.58
20	OT	7.38	6.92	7.27	7.05	1.96	2.23	26	31	22	26		53	54	18.3	18.7	13.8	13.7	45.7	45.9	1.32	1.32	1.3	1.32
21	OT	7.9	7.26	7.95	7.61	1.9	2.2	24	24	24	26		64.1	62.7	22.4	22	22.8	20.1	49.5	50.1	2.26	2.18	2.61	2.45
22	OT	7.99	6.86	7.43	7.14	1.9	2.17	26	26	19	23		71.1	70	24.9	24.5	25.3	21.6	53.1	53.7	3.24	3.2	3.22	3.18
23	OT	8.11	7.52	7.58	7.23	1.81	1.99	24	25	18	24		60.7	61	19.2	19.3	12	12.6	53.4	53.9	1.33	1.35	1.31	1.29
24	OT	7.11	7	7.25	7.1	2.1	2.29	28	29	24	24		67.9	67.4	21.7	21.7	19.9	18.9	54.4	53.1	2.43	2.37	2.42	2.37
25	OT	8.02	7.51	7.69	7.42	1.9	2.26	21	22	23	23		65.1	64.5	21.8	21.6	17.1	17.2	54	53.8	2	2.1	1.98	1.99
26	OT	7.63	7.23	7.72	7.47	1.8	2.02	20	22	27	28		60.1	60.6	20.8	21	13.5	13.3	52	51.8	1.45	1.46	1.45	1.46
27	OT	7.35	6.23	7.5	7.25	1.85	2.07	23	23	21	23		59.7	61	20.2	20.6	15.2	15.1	50.6	50.7	1.63	1.62	1.63	1.62
28	OT	8.2	7.45	8.01	7.89	1.8	2.23	21	22	16	19		63.3	62	23	22.5	22.6	21.4	49	48.1	2.6	2.57	2.57	2.56
		pre	post	pre	post	pre	post	pre	post	pre	post		pre	post	pre	post	pre	post	pre	post	pre	post	pre	post
TT	Mean	7.39857	7.18714	7.74071	7.66929	1.94643	2.06429	22.3571	23.7857	19.6429	21.9286		64.15	63.3857	21.1857	20.9	17.3571	16.6143	52.6571	52.3786	2.085	1.96286	2.08357	1.94214
	SD	0.42504	0.50338	0.443993	0.439763	0.163359	0.174784	3.65023	3.21484	3.71291	3.93142		10.3332	9.14413	2.7551	2.43753	5.74479	4.86223	5.63597	5.33583	0.996646	0.842957	0.997625	0.835926
OT	Mean	7.71	7.065	7.57429	7.33643	1.93	2.17143	22.6429	24.5714	21	23.5		64.5071	63.9643	21.9643	21.7714	19.5143	18.3286	51.6786	51.4571	2.28	2.24143	2.29643	2.24143
	SD	0.367361	0.46028	0.313386	0.313899	0.105975	0.0935502	2.67775	2.76557	3.70031	2.92864		6.99818	6.15987	2.13887	1.9177	4.94428	3.93787	3.79355	3.89175	0.764752	0.7434	0.771777	0.744073
